# Supplementary material for: Etiological influences on the stability of autistic traits from childhood to early adulthood: evidence from a twin study
Source: Mol Autism. 2017 Feb 17;8:5. doi: 10.1186/s13229-017-0120-5 (PMC5351180; doi:10.1186/s13229-017-0120-5)
Supplement: Additional file 3: — Saturated model fitting. Table showing the results of saturated model fitting used to test assumptions and sex differences. (PDF 117 kb) [file 13229_2017_120_MOESM3_ESM.pdf]

*Tests of saturated models*

| Model | -2LL     | df   | Parameters | AIC     | BIC       | $\Delta\chi^2$ | $\Delta df$ | p     |
|-------|----------|------|------------|---------|-----------|----------------|-------------|-------|
| 1     | 25044.31 | 9494 | 70         | 6056.31 | -49743.70 | -----          | -----       | ----- |
| 2     | 25265.38 | 9502 | 62         | 6261.38 | -49585.65 | 221.207        | 8           | <.001 |
| 3     | 25072.52 | 9502 | 62         | 6068.52 | -49778.51 | 28.22          | 8           | <.001 |
| 4     | 25067.06 | 9498 | 66         | 6071.06 | -49752.46 | 22.75          | 4           | <.001 |
| 5     | 25047.08 | 9498 | 66         | 6051.08 | -49772.44 | 2.77           | 4           | .60   |

*Model descriptions:*

1. Unconstrained saturated model

2. Equal variances across zygosity for autistic traits at age 9

3: Equal variances across zygosity for autistic traits at age 18

4: Equal cross-twin covariances across sex (allowing opposite-sex twin correlations to differ from same-sex twin correlations)

5: Equal cross-trait cross-twin covariances across sex (allowing opposite-sex twin correlations to differ from same-sex twin correlations)

The fit of the four constrained models is compared with the unconstrained model (model 1) in all cases

-2LL: fit statistic, which is  $-2 \times \log$ -likelihood of data; df: degrees of freedom; AIC: Akaike's Information Criteria;  $\Delta\chi^2$ : difference in -2LL between the unconstrained saturated model and each constrained model, distributed  $\chi^2$ ;  $\Delta df$ : change in degrees of freedom between two models, equal to the difference in number of parameters; p: p-value from the likelihood-ratio test. Significant values (defined as  $p < .05$ ) reflect that a given model fits significantly worse than the unconstrained model.
