# Supplementary material for: Etiological influences on the stability of autistic traits from childhood to early adulthood: evidence from a twin study
Source: Mol Autism. 2017 Feb 17;8:5. doi: 10.1186/s13229-017-0120-5 (PMC5351180; doi:10.1186/s13229-017-0120-5)
Supplement: Additional file 5: — DeFries-Fulker analysis results. Three tables showing the full results of DeFries-Fulker analysis of the extremes, including descriptive statistics, univariate results, and bivariate results. (PDF 88 kb) [file 13229_2017_120_MOESM5_ESM.pdf]

## DeFries-Fulker Analysis Results

*Table 1 Number of probands and descriptive statistics*

| Measure   | N MZ Pro. | N DZ Pro. | Age 12<br>Mean | Age 18<br>Mean |
|-----------|-----------|-----------|----------------|----------------|
| ATAC 9/12 | 58        | 91        | 3.37 (1.90)    | 2.59 (2.27)    |
| ATAC 18   | 75        | 73        | 1.60 (2.22)    | 4.08 (1.55)    |

*A-TAC: Autism, tics, and other comorbidities inventory*

*N MZ Pro: number of MZ probands; N DZ Pro: number of DZ probands*

*Age 12 Mean: mean A-TAC score at age 12; Age 18 Mean: mean A-TAC score at age 18*

*Table 2 Univariate DeFries-Fulker analysis*

|                | MZ Transformed Co-Twin Mean | DZ Transformed Co-Twin Mean | Group Heritability |
|----------------|-----------------------------|-----------------------------|--------------------|
| A-TAC Age 9/12 | .59                         | .16                         | .59 (.28-.59)      |
| A-TAC Age 18   | .69                         | .11                         | .69 (.36-.69)      |

*Table 3 Bivariate DeFries-Fulker analysis*

| Analysis               | PGC | Transformed Co-Twin Means |     | Bivariate Heritability |
|------------------------|-----|---------------------------|-----|------------------------|
|                        |     | MZ                        | DZ  |                        |
| A-TAC 9/12 -> A-TAC 18 | .48 | .46                       | .05 | .46 (.13-.46)          |
| A-TAC 18 -> A-TAC 9/12 | .48 | .36                       | .10 | .36 (-.01-.36)         |

*A-TAC 9/12: Autism, tics, and other comorbidities inventory at age 9/12; A-TAC 18: Autism, tics and other comorbidities inventory at age 18*

*PGC: phenotypic group correlation; MZ: monozygotic twins; DZ: dizygotic twins*
