# Supplementary material for: Etiological influences on the stability of autistic traits from childhood to early adulthood: evidence from a twin study
Source: Springer Nature journal article supplement (doi:10.1186/s13229-017-0120-5), 2017-02-17
Supplement: MOESM2 [file 12141912]

**Histogram of ATAC12**

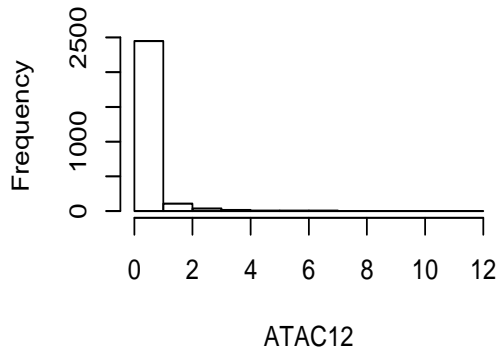

**Histogram of ATAC18**

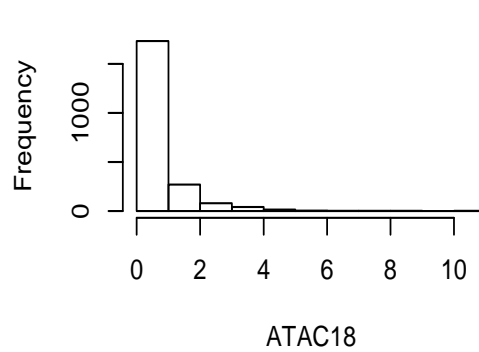

**Histogram of TransformedATAC12**

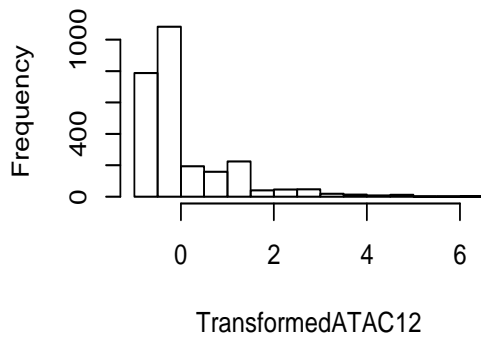

**Histogram of TransformedATAC18**

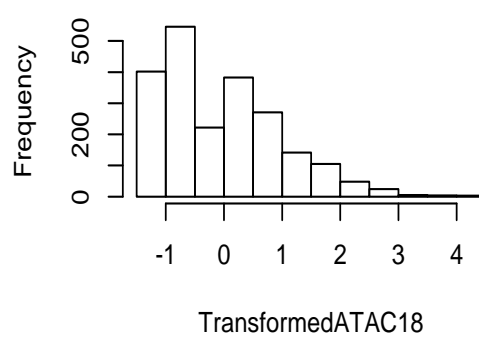

*ATAC12: Untransformed Autism-Tics, AD/HD and other Comorbidities inventory, age 9/12*

*ATAC18: Untransformed Autism-Tics, AD/HD and other Comorbidities inventory, age 18*

*TransformedATAC12: Log transformed Autism-Tics, AD/HD and other Comorbidities inventory, age 9/12 (scale used in analyses)*

*TransformedATAC18: Log transformed Autism-Tics, AD/HD and other Comorbidities inventory, age 18 (scale used in analyses)*
